# Supplementary material for: Metal regulated organic–inorganic hybrid ferroelastic materials: [(CH3)3CN(CH3)2CH2F]2[MBr4] (M = Cd and Zn)
Source: Royal Society of Chemistry journal article supplement (doi:10.1039/d1qi01533h), 2022-01-01
Supplement: d1qi01533h1.pdf [file d1qi01533h1.pdf]

## Supporting Information

### Metal Regulated Organic–Inorganic Hybrid Ferroelastic

#### Materials: $[(\text{CH}_3)_3\text{CN}(\text{CH}_3)_2\text{CH}_2\text{F}]_2[\text{MBr}_4]$ (M = Cd and Zn)

Xin Meng,<sup>§</sup> Zhi-Bo Liu,<sup>§</sup> Ke Xu, Lei He, Yu-Zhen Wang, Ping-Ping Shi, Qiong Ye\*

### EXPERIMENTAL SECTION

**Synthesis.** To synthesize Dimethyl-(tert-butyl)-fluoro-methyl-ammonium bromide, N, N-Dimethyl-tert-butylamine (4.048 g, 40 mmol) and fluorobromomethane (4.517 g, 40 mmol) were added to in dichloromethane (50.0 mL) in an ice-water bath. Then, the mixture was stirred continuously at room temperature for 4 hours. After suction filtration the resulting white precipitates were washed three times with ethyl acetate (yield=60%). The purity of product was improved by recrystallization with ethanol/ethyl (1/10) and was confirmed by the mass spectrum with liquid chromatography/time-of-flight mass spectrometry.

The equimolar mixture of  $[(\text{CH}_3)_3\text{CN}(\text{CH}_3)_2\text{CH}_2\text{F}]\text{Br}$  and  $\text{CdBr}_2 \cdot 4\text{H}_2\text{O}$  was dissolved in deionized water. This mixture was stirred till becoming clear and then was evaporated at room temperature. After 3 weeks of slow evaporation, colorless strip-like crystals of  $[(\text{CH}_3)_3\text{CN}(\text{CH}_3)_2\text{CH}_2\text{F}]_2[\text{CdBr}_4]$  (**1**) were obtained. Similarly, colorless strip-like crystals of  $[(\text{CH}_3)_3\text{CN}(\text{CH}_3)_2\text{CH}_2\text{F}]_2[\text{ZnBr}_4]$  (**2**) were grown by the slow evaporation of the aqueous solution containing equimolar  $[(\text{CH}_3)_3\text{CN}(\text{CH}_3)_2\text{CH}_2\text{F}]\text{Br}$  and  $\text{ZnBr}_2$  at room temperature. For compounds **1** and **2**, the toxicity of cadmium and zinc should be noted owing to the organic-inorganic hybrid material. The solubility of **1** is 18.6 g/100 mL water at 20 °C and the solubility of **2** is 46.3 g/100 mL at 20 °C.

### Characterizations.

#### IR Spectrum Measurement

IR spectral measurements were performed on KBr diluted pellets of compounds **1** and **2** at room temperature using a Shimadzu model IR-60 spectrometer.

### **Powder X-ray Diffraction**

The powder X-ray diffraction (PXRD) data for compounds **1** and **2** were measured on a PANalytical X'Pert PRO X-Ray Diffractometer at 293 K. Diffraction patterns were collected in the  $2\theta$  range of 5–50° with a step size of 0.02°.

### **Thermogravimetric Analysis (TGA)**

Thermogravimetric analysis of compound **1** and **2** were performed on a Netzsch Model TG 209F1 instrument. The measurements were collected in nitrogen flow from 305 K to 1000 K, and the results show that both compounds **1** and **2** begin to decompose at 410 K.

### **Differential Scanning Calorimetry**

Differential scanning calorimetry (DSC) of compounds **1** and **2** were measured on PerkinElmer Diamond DSC instrument that 25.6 mg (**1**) and 13.6 mg (**2**) powder samples were placed in aluminum crucibles with heating and cooling rates of 20 K/min under nitrogen atmosphere.

### **Single Crystal X-ray Crystallography**

Variable-temperature single-crystal X-ray diffraction data sets of **1** and **2** were collected with a Rigaku Saturn 924 diffractometer with Mo K $\alpha$  radiation ( $\lambda=0.71073$  Å) (220 K and 293 K for **1**, 200 K, 233 K and 293 K for **2**). The Crystal-clear software package was used to perform all data collections including empirical absorption corrections. The crystal structures of **1** and **2** were solved by direct methods and refined by the full-matrix method based on  $F^2$  data by the SHELXL-97 software package. Non-hydrogen atoms were refined anisotropically by using reflections with  $I > 2\sigma(I)$ . Crystallographic data and structure refinements for **1** and **2** are listed in Table S1 and S5.

### **Dielectric Measurements**

The powder-pressed pellets of compounds **1** and **2** coated with silver conducting glue on both sides were used in dielectric measurements. The temperature dependent

dielectric permittivity was measured on a Tonghui TH2828A over the frequency range from 50 kHz to 1 MHz, with an applied electric field of 1 V.

### Ferroelastic Measurements

For ferroelastic properties, ferroelastic domain observations of compounds **1** and **2** were carried on an Olympus BX51TRF polarizing microscope in heating/cooling cycle. The temperature was controlled by the INSTEC HCC602 cooling/heating stage. Aqueous saturated solution (20  $\mu$ L) of **1** was dropped on a prepared indium tin oxide (ITO)-coated glass, and thin film was obtained at heating stage of 353 K. The crystal **2** was directly observed under the polarizing microscope. According to a heating and cooling cycle, the transforming of domain structures of compounds **1** and **2** can be observed.

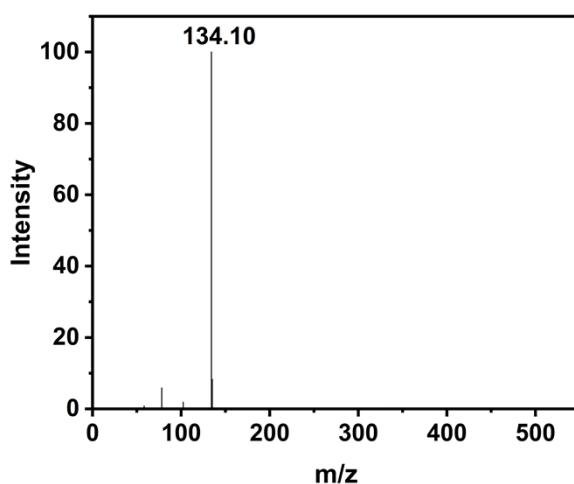

**Figure S1.** The mass spectrum of  $[(\text{CH}_3)_3\text{CN}(\text{CH}_3)_2\text{CH}_2\text{F}]^+$ .

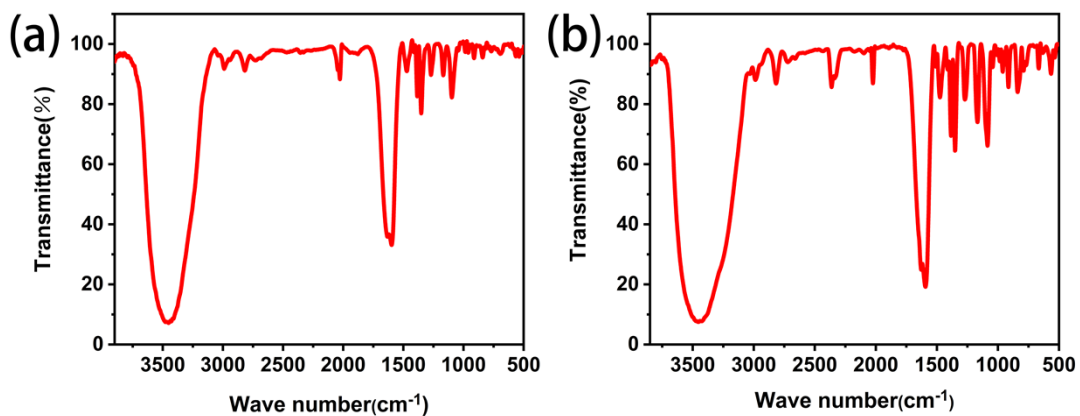

**Figure S2.** IR spectrums of **1** (a) and **2** (b) on a KBr-diluted pellet at room temperature.

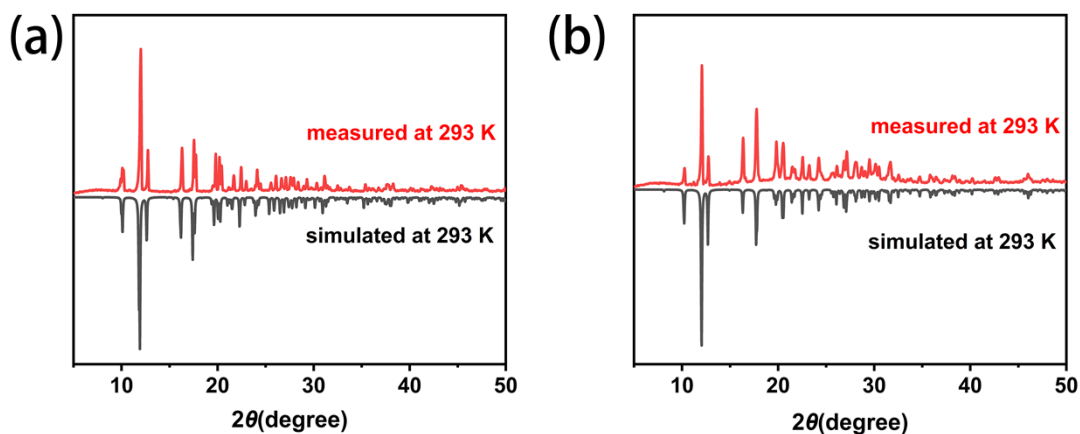

**Figure S3.** Powder XRD patterns of **1** (a) and **2** (b) at 293 K.

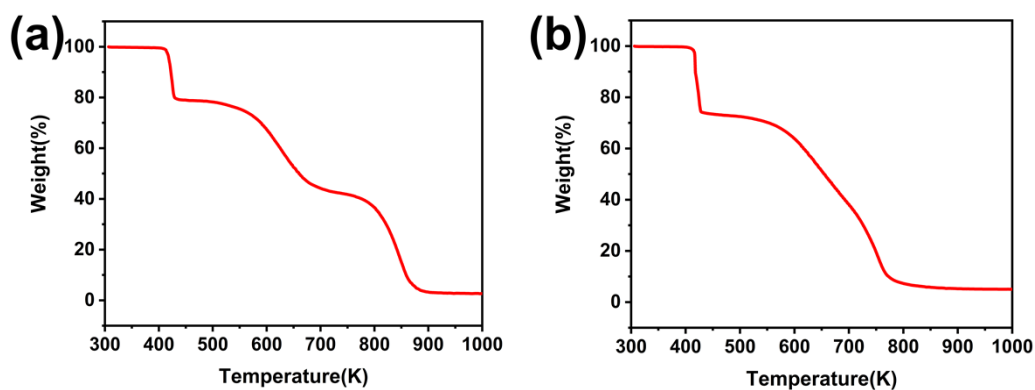

**Figure S4.** Thermogravimetric analysis curves of compounds **1**(a) and **2**(b).

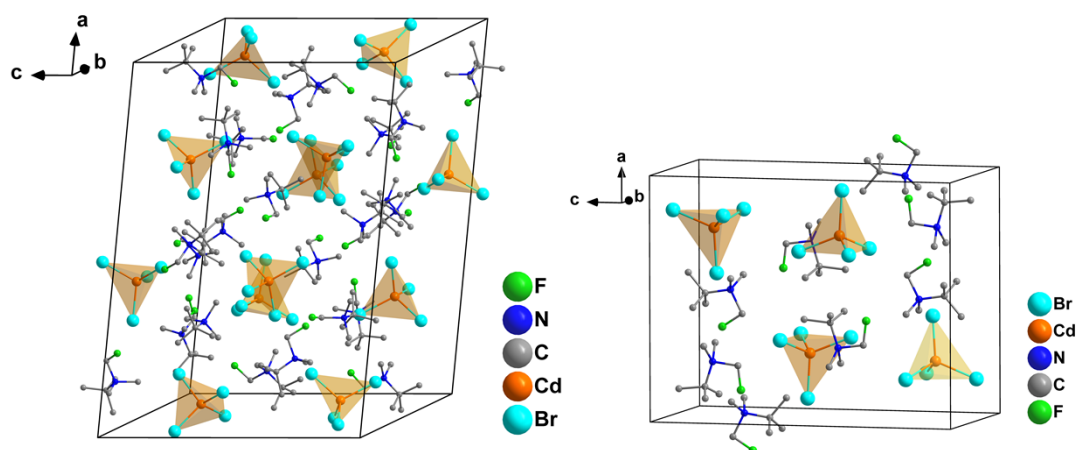

**Figure S5.** Structural packing diagrams of **1** at LTP<sub>1</sub> (left) and HTP<sub>1</sub> (right). All hydrogen atoms are omitted for clarity.

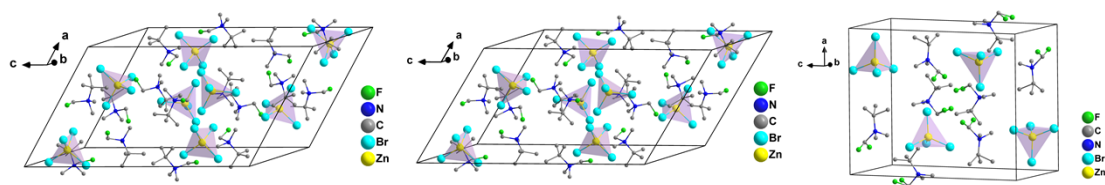

**Figure S6.** Structural packing diagrams of **2** at LTP<sub>2</sub> (left), ITP<sub>2</sub> (middle) and HTP<sub>2</sub> (right). All hydrogen atoms are omitted for clarity.

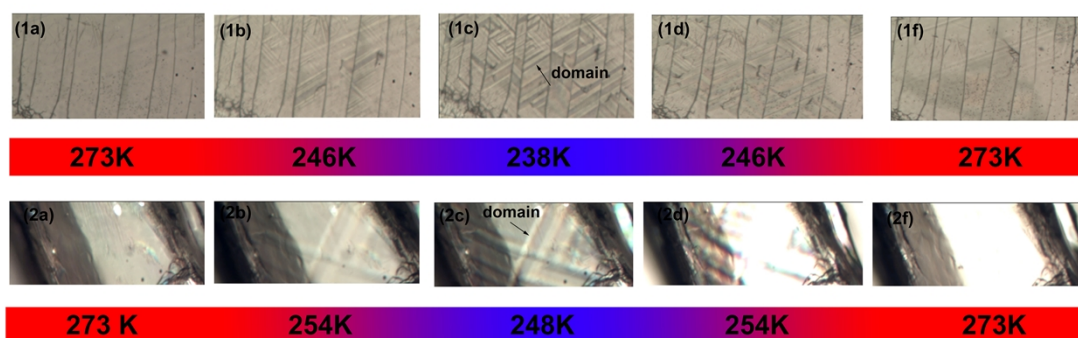

**Figure S7.** Evolution of the domain structures of compounds **1** and **2** during the heating and cooling process.

**Table S1.** Crystal data, data collection and structure refinement details of crystal **1** at 220 K and 293 K.

|                                                | 220 K                                                                           | 293 K                                                                           |
|------------------------------------------------|---------------------------------------------------------------------------------|---------------------------------------------------------------------------------|
| Chemical Formula                               | C <sub>14</sub> H <sub>34</sub> Br <sub>4</sub> CdF <sub>2</sub> N <sub>2</sub> | C <sub>14</sub> H <sub>34</sub> Br <sub>4</sub> CdF <sub>2</sub> N <sub>2</sub> |
| Formula weight                                 | 700.47                                                                          | 700.47                                                                          |
| Crystal system                                 | Monoclinic                                                                      | Orthorhombic                                                                    |
| Space group                                    | <i>P2<sub>1</sub>/c</i>                                                         | <i>Pnma</i>                                                                     |
| <i>a</i> , Å                                   | 25.5761 (15)                                                                    | 14.014 (2)                                                                      |
| <i>b</i> , Å                                   | 15.1486 (7)                                                                     | 10.0680                                                                         |
| <i>c</i> , Å                                   | 18.9359 (11)                                                                    | 17.771 (3)                                                                      |
| <i>α</i> , deg                                 | 90                                                                              | 90                                                                              |
| <i>β</i> , deg                                 | 100.579 (6)                                                                     | 90                                                                              |
| <i>γ</i> , deg                                 | 90                                                                              | 90                                                                              |
| <i>V</i> , Å <sup>3</sup>                      | 7211.9 (7)                                                                      | 2507.3 (7)                                                                      |
| <i>Z</i>                                       | 12                                                                              | 4                                                                               |
| <i>F</i> (000)                                 | 4056                                                                            | 1352                                                                            |
| <i>μ</i> , mm <sup>-1</sup>                    | 7.57                                                                            | 7.26                                                                            |
| <i>α</i> , deg                                 | 90                                                                              | 90                                                                              |
| Index ranges                                   | -30 ≤ <i>h</i> ≤ 30<br>-18 ≤ <i>k</i> ≤ 17<br>-22 ≤ <i>l</i> ≤ 22               | -16 ≤ <i>h</i> ≤ 15<br>-11 ≤ <i>k</i> ≤ 11<br>-19 ≤ <i>l</i> ≤ 21               |
| <i>D</i> <sub>calcd</sub> , g•cm <sup>-3</sup> | 1.935                                                                           | 1.856                                                                           |
| Reflections measured                           | 60486                                                                           | 10604                                                                           |
| Reflections independent                        | 12695                                                                           | 2338                                                                            |
| Reflections used                               | 7339                                                                            | 967                                                                             |
| <i>S</i>                                       | 1.26                                                                            | 1.38                                                                            |
| <i>R</i> <sub>1</sub>                          | 0.1314                                                                          | 0.0949                                                                          |
| <i>wR</i> <sub>2</sub>                         | 0.3404                                                                          | 0.3067                                                                          |

**Table S2.** The key bond distances (Å) and angles (°) of **1** at 220 K and 293 K.

|       |         |            |          |            |
|-------|---------|------------|----------|------------|
|       | F2—C16  | 1.419 (13) | C24—C27  | 1.536 (14) |
|       | N5—C16  | 1.491 (14) | C24—C29  | 1.547 (15) |
|       | N5—C15  | 1.502 (15) | F7—C5    | 1.390 (13) |
|       | N5—C14  | 1.523 (14) | N1—C3    | 1.493 (14) |
|       | N5—C10  | 1.526 (13) | N1—C5    | 1.505 (13) |
|       | C10—C11 | 1.528 (14) | N1—C4    | 1.494 (13) |
|       | C10—C13 | 1.515 (15) | N1—C6    | 1.533 (13) |
|       | C10—C12 | 1.535 (14) | C6—C8    | 1.501 (14) |
|       | F3—C22  | 1.425 (15) | C6—C7    | 1.505 (14) |
|       | N3—C20  | 1.496 (15) | C6—C9    | 1.514 (13) |
|       | N3—C22  | 1.499 (15) | F8—C45   | 1.423 (14) |
|       | N3—C23  | 1.508 (13) | N6—C46   | 1.498 (14) |
|       | N3—C21  | 1.506 (15) | N6—C45   | 1.496 (15) |
| 220 K | C23—C47 | 1.522 (16) | N6—C49   | 1.498 (16) |
|       | C23—C30 | 1.531 (15) | N6—C32   | 1.531 (13) |
|       | C23—C48 | 1.536 (16) | C32—C33  | 1.527 (14) |
|       | F5—C42  | 1.411 (15) | C32—C34  | 1.538 (15) |
|       | N2—C41  | 1.493 (14) | C32—C35  | 1.534 (15) |
|       | N2—C40  | 1.501 (15) | Cd1—Br4  | 2.585 (2)  |
|       | N2—C42  | 1.499 (14) | Cd1—Br3  | 2.593 (2)  |
|       | N2—C43  | 1.506 (14) | Cd1—Br1  | 2.596 (2)  |
|       | C37—C43 | 1.518 (14) | Cd1—Br2  | 2.600 (2)  |
|       | C38—C43 | 1.531 (15) | Cd3—Br7  | 2.576 (3)  |
|       | C39—C43 | 1.538 (14) | Cd3—Br8  | 2.589 (3)  |
|       | F6—C44  | 1.389 (15) | Cd3—Br5  | 2.589 (2)  |
|       | N4—C44  | 1.503 (14) | Cd3—Br6  | 2.598 (3)  |
|       | N4—C26  | 1.496 (14) | Cd2—Br12 | 2.588 (2)  |
|       | N4—C24  | 1.519 (13) | Cd2—Br11 | 2.590 (3)  |

|       |             |            |             |            |
|-------|-------------|------------|-------------|------------|
|       | N4—C50      | 1.518 (13) | Cd2—Br10    | 2.596 (2)  |
|       | C24—C28     | 1.535 (14) | Cd2—Br9     | 2.595 (2)  |
|       | C16—N5—C15  | 109.7 (13) | N4—C24—C29  | 109.5 (10) |
|       | C16—N5—C14  | 105.6 (12) | C28—C24—C29 | 107.3 (11) |
|       | C15—N5—C14  | 105.9 (12) | C27—C24—C29 | 108.9 (12) |
|       | C16—N5—C10  | 108.0 (9)  | F6—C44—N4   | 107.9 (12) |
|       | C15—N5—C10  | 111.1 (11) | C3—N1—C5    | 110.2 (11) |
|       | C14—N5—C10  | 116.3 (10) | C3—N1—C4    | 109.2 (11) |
|       | C11—C10—C13 | 112.1 (13) | C5—N1—C4    | 106.5 (11) |
|       | C11—C10—N5  | 108.3 (11) | C3—N1—C6    | 113.9 (10) |
|       | C13—C10—N5  | 111.5 (10) | C5—N1—C6    | 104.5 (8)  |
|       | C11—C10—C12 | 106.6 (13) | C4—N1—C6    | 112.3 (10) |
| 220 K | C13—C10—C12 | 108.1 (12) | F7—C5—N1    | 105.5 (12) |
|       | N5—C10—C12  | 110.1 (11) | C8—C6—C7    | 108.7 (11) |
|       | F2—C16—N5   | 109.6 (12) | C8—C6—C9    | 107.6 (11) |
|       | C20—N3—C22  | 114.7 (14) | C7—C6—C9    | 109.1 (11) |
|       | C20—N3—C23  | 112.7 (12) | C8—C6—N1    | 107.8 (10) |
|       | C22—N3—C23  | 107.6 (10) | C7—C6—N1    | 111.4 (11) |
|       | C20—N3—C21  | 104.4 (13) | C9—C6—N1    | 112.1 (9)  |
|       | C22—N3—C21  | 106.7 (15) | C46—N6—C45  | 93.5 (13)  |
|       | C23—N3—C21  | 110.6 (13) | C46—N6—C49  | 123.2 (15) |
|       | F3—C22—N3   | 107.1 (14) | C45—N6—C49  | 100.8 (13) |
|       | C47—C23—N3  | 111.0 (13) | C46—N6—C32  | 112.3 (13) |
|       | C47—C23—C30 | 102.7 (17) | C45—N6—C32  | 105.0 (10) |
|       | N3—C23—C30  | 110.2 (12) | C49—N6—C32  | 116.2 (11) |
|       | C47—C23—C48 | 116.1 (15) | C33—C32—N6  | 108.4 (10) |
|       | N3—C23—C48  | 112.8 (12) | C33—C32—C34 | 110.3 (13) |
|       | C30—C23—C48 | 103.0 (14) | N6—C32—C34  | 108.9 (11) |



|       |                      |             |                    |            |
|-------|----------------------|-------------|--------------------|------------|
|       | C41—N2—C40           | 106.9 (13)  | C33—C32—C35        | 107.6 (14) |
|       | C41—N2—C42           | 106.5 (14)  | N6—C32—C35         | 111.1 (11) |
|       | C40—N2—C42           | 112.7 (14)  | C34—C32—C35        | 110.5 (14) |
|       | C41—N2—C43           | 113.0 (12)  | F8—C45—N6          | 113.2 (13) |
|       | C40—N2—C43           | 112.2 (12)  | Br4—Cd1—Br3        | 104.32 (7) |
|       | C42—N2—C43           | 105.6 (10)  | Br4—Cd1—Br1        | 110.34 (7) |
|       | F5—C42—N2            | 101.6 (12)  | Br3—Cd1—Br1        | 116.51 (7) |
|       | N2—C43—C37           | 108.1 (11)  | Br4—Cd1—Br2        | 113.31 (8) |
|       | N2—C43—C39           | 111.5 (12)  | Br3—Cd1—Br2        | 106.63 (7) |
|       | C37—C43—C39          | 114.0 (13)  | Br1—Cd1—Br2        | 105.91 (7) |
| 220 K | N2—C43—C38           | 109.7 (13)  | Br7—Cd3—Br8        | 113.35 (9) |
|       | C37—C43—C38          | 110.8 (14)  | Br7—Cd3—Br5        | 108.63 (9) |
|       | C39—C43—C38          | 102.5 (15)  | Br8—Cd3—Br5        | 103.73 (8) |
|       | C44—N4—C26           | 106.8 (11)  | Br7—Cd3—Br6        | 108.75(10) |
|       | C44—N4—C24           | 107.1 (9)   | Br8—Cd3—Br6        | 112.12 (9) |
|       | C26—N4—C24           | 114.4 (10)  | Br5—Cd3—Br6        | 110.12 (8) |
|       | C44—N4—C50           | 109.1 (11)  | Br12—Cd2—Br11      | 108.70 (8) |
|       | C26—N4—C50           | 108.5 (11)  | Br12—Cd2—Br10      | 109.28 (8) |
|       | C24—N4—C50           | 110.8 (10)  | Br11—Cd2—Br10      | 113.05 (9) |
|       | N4—C24—C28           | 110.5 (10)  | Br12—Cd2—Br9       | 111.93 (9) |
|       | N4—C24—C27           | 111.5 (10)  | Br11—Cd2—Br9       | 105.38 (9) |
|       | C28—C24—C27          | 109.0 (11)  | Br10—Cd2—Br9       | 108.50 (8) |
|       | Br1—Cd1              | 2.5633 (8)  | C2—C12             | 1.552 (8)  |
|       | Cd1—Br1 <sup>i</sup> | 2.5633 (8)  | C6—N2              | 1.516 (6)  |
|       | Cd1—Br3              | 2.5785 (10) | C6—C7              | 1.531 (6)  |
| 293 K | Cd1—Br2              | 2.5994 (10) | C6—C7 <sup>i</sup> | 1.531 (6)  |
|       | N1—C2                | 1.500 (8)   | C6—C13             | 1.518 (9)  |
|       | N1—C11               | 1.511 (8)   | N2—C9              | 1.525 (7)  |
|       | N1—C4                | 1.536 (7)   | N2—C10             | 1.540 (6)  |

|       |                           |            |                         |           |
|-------|---------------------------|------------|-------------------------|-----------|
|       | N1—C4 <sup>i</sup>        | 1.536 (7)  | N2—C10 <sup>i</sup>     | 1.540 (6) |
|       | C2—C3 <sup>i</sup>        | 1.559 (6)  | F1—C9                   | 1.398 (8) |
|       | C2—C3                     | 1.559 (6)  | F2—C11                  | 1.392 (8) |
|       | Br1—Cd1—Br1 <sup>i</sup>  | 110.61 (4) | C3 <sup>i</sup> —C2—C12 | 103.5 (4) |
|       | Br1—Cd1—Br3               | 108.77 (2) | C3—C2—C12               | 103.5 (4) |
|       | Br1 <sup>i</sup> —Cd1—Br3 | 108.77 (2) | N2—C6—C7                | 107.3 (3) |
|       | Br1—Cd1—Br2               | 106.89 (2) | N2—C6—C7 <sup>i</sup>   | 107.3 (3) |
|       | Br1 <sup>i</sup> —Cd1—Br2 | 106.89 (2) | C7—C6—C7 <sup>i</sup>   | 117.1 (6) |
| 293 K | Br3—Cd1—Br2               | 114.88 (4) | N2—C6—C13               | 122.2 (5) |
|       | C2—N1—C11                 | 100.0 (4)  | C7—C6—C13               | 101.8 (4) |
|       | C2—N1—C4                  | 124.6 (4)  | C7 <sup>i</sup> —C6—C13 | 101.8 (4) |
|       | C11—N1—C4                 | 102.2 (5)  | C6—N2—C9                | 107.9 (4) |
|       | C2—N1—C4 <sup>i</sup>     | 124.6 (4)  | C6—N2—C10               | 109.0 (3) |
|       | C11—N1—C4 <sup>i</sup>    | 102.2 (5)  | C9—N2—C10               | 108.4 (3) |
|       | C4—N1—C4 <sup>i</sup>     | 99.0 (6)   | C6—N2—C10 <sup>i</sup>  | 109.0 (3) |
|       | N1—C2—C3 <sup>i</sup>     | 103.8 (4)  | C9—N2—C10 <sup>i</sup>  | 108.4 (3) |
|       | N1—C2—C3                  | 103.8 (4)  | C10—N2—C10 <sup>i</sup> | 114.0 (6) |
|       | C3 <sup>i</sup> —C2—C3    | 128.7 (7)  | F1—C9—N2                | 96.3 (5)  |
|       | N1—C2—C12                 | 113.9 (7)  | F2—C11—N1               | 104.7 (5) |

Symmetry code: (i)  $x, -y+1/2, z$ .

**Table S3.** Hydrogen bonds at 220 K for **1**.

| D—H···A                       | D—H  | H···A | D···A      | <DHA |
|-------------------------------|------|-------|------------|------|
| C49—H49C···Br5 <sup>i</sup>   | 0.96 | 2.91  | 3.82 (2)   | 160  |
| C46—H46B···F8                 | 0.96 | 2.14  | 2.69 (3)   | 115  |
| C45—H45A···Br11               | 0.97 | 2.97  | 3.78 (2)   | 142  |
| C35—H35C···Br9 <sup>ii</sup>  | 0.96 | 3.08  | 4.029 (19) | 168  |
| C34—H34A···Br5 <sup>i</sup>   | 0.96 | 3.04  | 3.98 (2)   | 166  |
| C8—H8A···F5                   | 0.96 | 2.57  | 3.20 (2)   | 123  |
| C5—H5A···Br1 <sup>ii</sup>    | 0.97 | 3.08  | 3.636 (14) | 118  |
| C4—H4B···Br10                 | 0.96 | 3.21  | 4.061 (16) | 149  |
| C3—H3B···Br10                 | 0.96 | 3.10  | 3.885 (17) | 140  |
| C3—H3A···F8                   | 0.96 | 2.45  | 3.33 (2)   | 152  |
| C50—H50C···Br2 <sup>iii</sup> | 0.96 | 3.03  | 3.907 (18) | 153  |
| C50—H50B···Br12               | 0.96 | 3.17  | 3.926 (17) | 137  |
| C44—H44B···Br2 <sup>iii</sup> | 0.97 | 3.06  | 3.811 (17) | 135  |
| C44—H44A···Br12 <sup>iv</sup> | 0.97 | 2.97  | 3.563 (14) | 121  |
| C29—H29C···Br3 <sup>iv</sup>  | 0.96 | 3.08  | 3.940 (19) | 150  |
| C29—H29C···F8                 | 0.96 | 2.56  | 3.30 (2)   | 134  |
| C29—H29B···F7                 | 0.96 | 2.58  | 3.26 (2)   | 128  |
| C28—H28C···Br1 <sup>iv</sup>  | 0.96 | 2.90  | 3.792 (17) | 155  |
| C28—H28A···Br2 <sup>iii</sup> | 0.96 | 3.08  | 4.033 (19) | 173  |
| C27—H27A···Br3 <sup>ii</sup>  | 0.96 | 3.12  | 4.063 (16) | 166  |
| C42—H42A···Br4 <sup>v</sup>   | 0.97 | 2.99  | 3.87 (2)   | 151  |
| C41—H41C···Br9 <sup>ii</sup>  | 0.96 | 3.07  | 3.823 (18) | 137  |
| C41—H41B···Br7 <sup>vi</sup>  | 0.96 | 2.92  | 3.86 (2)   | 165  |
| C41—H41A···F3                 | 0.96 | 2.49  | 3.08 (2)   | 119  |
| C40—H40A···Br5                | 0.96 | 2.95  | 3.62 (2)   | 128  |
| C39—H39C···Br7 <sup>vi</sup>  | 0.96 | 3.11  | 3.95 (2)   | 147  |
| C39—H39B···Br7 <sup>vii</sup> | 0.96 | 3.08  | 3.991 (19) | 158  |

|                                |      |      |            |     |
|--------------------------------|------|------|------------|-----|
| C48—H48A···Br8 <sup>vi</sup>   | 0.96 | 3.12 | 4.03 (2)   | 159 |
| C30—H30C···Br6                 | 0.96 | 3.04 | 3.98 (2)   | 165 |
| C30—H30B···Br6 <sup>viii</sup> | 0.96 | 3.09 | 4.00 (2)   | 158 |
| C21—H21C···F3                  | 0.96 | 2.20 | 2.69 (3)   | 110 |
| C21—H21A···Br9                 | 0.96 | 3.05 | 3.99 (2)   | 168 |
| C20—H20C···Br10                | 0.96 | 3.00 | 3.848 (17) | 147 |
| C20—H20B···Br9                 | 0.96 | 3.05 | 3.90 (2)   | 149 |
| C20—H20A···Br6                 | 0.96 | 3.01 | 3.900 (19) | 156 |
| C16—H16B···Br1 <sup>v</sup>    | 0.97 | 3.01 | 3.86 (2)   | 147 |
| C16—H16A···Br5                 | 0.97 | 2.97 | 3.87 (2)   | 155 |
| C14—H14B···Br6                 | 0.96 | 3.15 | 3.872 (17) | 133 |
| C14—H14B···Br5                 | 0.96 | 3.06 | 3.85 (2)   | 140 |
| C11—H11C···Br3 <sup>ix</sup>   | 0.96 | 3.15 | 4.04 (2)   | 155 |

Symmetry codes: (i)  $x, y-1, z$ ; (ii)  $x, -y+1/2, z-1/2$ ; (iii)  $-x+1, -y, -z+2$ ; (iv)  $-x+1, y-1/2, -z+3/2$ ; (v)  $-x+1, y+1/2, -z+3/2$ ; (vi)  $-x+2, y-1/2, -z+3/2$ ; (vii)  $x, -y+3/2, z-1/2$ ; (viii)  $-x+2, -y+1, -z+2$ ; (ix)  $-x+1, -y+1, -z+2$ .

**Table S4.** Hydrogen bonds at 293 K for **1**.

| D—H···A                       | D—H  | H···A | D···A      | <DHA |
|-------------------------------|------|-------|------------|------|
| C12—H12C···Br1 <sup>ii</sup>  | 0.96 | 3.07  | 4.004 (6)  | 164  |
| C12—H12B···Br1 <sup>iii</sup> | 0.96 | 3.07  | 4.004 (6)  | 164  |
| C12—H12A···Br2                | 0.96 | 2.92  | 3.866 (15) | 168  |
| C13—H13A···Br3 <sup>iv</sup>  | 0.96 | 3.01  | 3.948 (8)  | 165  |
| C9—H9B···Br1 <sup>v</sup>     | 0.97 | 2.80  | 3.684 (3)  | 152  |
| C9—H9A···Br1 <sup>vi</sup>    | 0.97 | 2.80  | 3.684 (3)  | 152  |
| C7—H7C···F1                   | 0.96 | 1.64  | 2.215 (9)  | 114  |
| C10—H10C···Br1 <sup>ii</sup>  | 0.96 | 3.06  | 3.920 (6)  | 151  |
| C3—H3C···F2                   | 0.96 | 1.71  | 2.239 (9)  | 111  |
| C3—H3A···Br1                  | 0.96 | 3.10  | 3.829 (8)  | 134  |
| C3—H3A···Br1                  | 0.96 | 3.10  | 3.829 (8)  | 134  |
| C3—H3C···F2                   | 0.96 | 1.71  | 2.239 (9)  | 111  |
| C10—H10C···Br1 <sup>ii</sup>  | 0.96 | 3.06  | 3.920 (6)  | 151  |
| C7—H7C···F1                   | 0.96 | 1.64  | 2.215 (9)  | 114  |
| C9—H9A···Br1 <sup>vi</sup>    | 0.97 | 2.80  | 3.684 (3)  | 152  |
| C9—H9B···Br1 <sup>v</sup>     | 0.97 | 2.80  | 3.684 (3)  | 152  |
| C13—H13A···Br3 <sup>iv</sup>  | 0.96 | 3.01  | 3.948 (8)  | 165  |
| C12—H12A···Br2                | 0.96 | 2.92  | 3.866 (15) | 168  |
| C12—H12B···Br1 <sup>iii</sup> | 0.96 | 3.07  | 4.004 (6)  | 164  |
| C12—H12C···Br1 <sup>ii</sup>  | 0.96 | 3.07  | 4.004 (6)  | 164  |

Symmetry codes: (ii)  $-x+1, -y, -z+1$ ; (iii)  $-x+1, y+1/2, -z+1$ ; (iv)  $x-1, y, z$ ; (v)  $-x+1/2, y+1/2, z+1/2$ ; (vi)  $-x+1/2, -y, z+1/2$ .

**Table S5.** Crystal data, data collection and structure refinement details of crystal **2** at 200 K, 233 K and 293 K.

|                                                | 200 K                                                   | 233 K                                                   | 293 K                                                   |
|------------------------------------------------|---------------------------------------------------------|---------------------------------------------------------|---------------------------------------------------------|
| Chemical Formula                               | 2(C <sub>7</sub> H <sub>17</sub> FN)·Br <sub>4</sub> Zn | 2(C <sub>7</sub> H <sub>17</sub> FN)·Br <sub>4</sub> Zn | 2(C <sub>7</sub> H <sub>16</sub> FN)·Br <sub>4</sub> Zn |
| Formula weight                                 | 653.44                                                  | 653.44                                                  | 651.41                                                  |
| Crystal system                                 | Monoclinic                                              | Monoclinic                                              | Orthorhombic                                            |
| Space group                                    | <i>P2<sub>1</sub>/c</i>                                 | <i>P2<sub>1</sub>/c</i>                                 | <i>Pnma</i>                                             |
| <i>a</i> , Å                                   | 14.1602 (4)                                             | 14.101 (3)                                              | 13.9404 (10)                                            |
| <i>b</i> , Å                                   | 15.8563 (4)                                             | 15.970 (2)                                              | 9.9595 (6)                                              |
| <i>c</i> , Å                                   | 24.3724 (8)                                             | 25.108 (4)                                              | 17.3700 (12)                                            |
| <i>α</i> , deg                                 | 90                                                      | 90                                                      | 90                                                      |
| <i>β</i> , deg                                 | 122.111 (2)                                             | 124.168 (9)                                             | 90                                                      |
| <i>γ</i> , deg                                 | 90                                                      | 90                                                      | 90                                                      |
| <i>V</i> , Å <sup>3</sup>                      | 4635.1 (2)                                              | 4678.2 (14)                                             | 2411.6 (3)                                              |
| <i>Z</i>                                       | 8                                                       | 8                                                       | 4                                                       |
| <i>F</i> (000)                                 | 2560                                                    | 2560                                                    | 1272                                                    |
| <i>μ</i> , mm <sup>-1</sup>                    | 7.97                                                    | 7.90                                                    | 7.66                                                    |
| Radiation (Mo Kα)                              | 0.71073                                                 | 0.71073                                                 | 0.71073                                                 |
|                                                | -13 ≤ <i>h</i> ≤ 16                                     | -14 ≤ <i>h</i> ≤ 16                                     | -16 ≤ <i>h</i> ≤ 16                                     |
| Index ranges                                   | -18 ≤ <i>k</i> ≤ 18                                     | -18 ≤ <i>k</i> ≤ 18                                     | -11 ≤ <i>k</i> ≤ 11                                     |
|                                                | -28 ≤ <i>l</i> ≤ 28                                     | -29 ≤ <i>l</i> ≤ 20                                     | -18 ≤ <i>l</i> ≤ 20                                     |
| <i>D</i> <sub>calcd</sub> , g·cm <sup>-3</sup> | 1.873                                                   | 1.856                                                   | 1.794                                                   |
| Reflections                                    | 36975                                                   | 21005                                                   | 16463                                                   |
| measured                                       |                                                         |                                                         |                                                         |
| Reflections                                    | 8154                                                    | 7199                                                    | 2256                                                    |
| independent                                    |                                                         |                                                         |                                                         |
| Reflections used                               | 6435                                                    | 3770                                                    | 1140                                                    |
| <i>S</i>                                       | 1.20                                                    | 1.27                                                    | 2.07                                                    |
| <i>R</i> <sub>1</sub>                          | 0.0688                                                  | 0.1284                                                  | 0.1142                                                  |

$wR_2$

0.1798

0.3249

0.3479

---

**Table S6.** The key bond distances (Å) and angles (°) of **2** at 200 K, 233 K and 293 K.

|          |           |             |            |             |
|----------|-----------|-------------|------------|-------------|
| 200 K    | F1—C7     | 1.379 (11)  | N3—C15     | 1.554 (10)  |
|          | N1—C7     | 1.509 (11)  | C15—C18    | 1.500 (17)  |
|          | N1—C6     | 1.510 (10)  | C15—C16    | 1.515 (17)  |
|          | N1—C5     | 1.516 (10)  | C15—C17    | 1.521 (13)  |
|          | N1—C1     | 1.579 (11)  | F4—C28     | 1.377 (9)   |
|          | C1—C2     | 1.504 (12)  | N4—C26     | 1.502 (11)  |
|          | C1—C4     | 1.529 (14)  | N4—C28     | 1.504 (11)  |
|          | C1—C3     | 1.535 (12)  | N4—C27     | 1.517 (10)  |
|          | F2—C14    | 1.363 (11)  | N4—C22     | 1.593 (9)   |
|          | N2—C14    | 1.512 (11)  | C22—C25    | 1.501 (13)  |
|          | N2—C12    | 1.516 (13)  | C22—C23    | 1.508 (11)  |
|          | N2—C13    | 1.531 (12)  | C22—C24    | 1.535 (13)  |
|          | N2—C8     | 1.573 (9)   | Br1—Zn1    | 2.4127 (13) |
|          | C8—C10    | 1.515 (12)  | Br2—Zn1    | 2.4162 (11) |
|          | C8—C9     | 1.522 (13)  | Br3—Zn1    | 2.4146 (13) |
|          | C8—C11    | 1.537 (13)  | Br4—Zn1    | 2.4346 (13) |
|          | F3—C20    | 1.306 (16)  | Br5—Zn2    | 2.4312 (12) |
|          | N3—C21    | 1.491 (12)  | Br6—Zn2    | 2.4034 (15) |
|          | N3—C19    | 1.505 (15)  | Br7—Zn2    | 2.4219 (12) |
|          | N3—C20    | 1.512 (14)  | Br8—Zn2    | 2.4014 (12) |
| C7—N1—C6 | 103.4 (7) | C18—C15—C16 | 111.5 (11) |             |
| C7—N1—C5 | 107.9 (7) | C18—C15—C17 | 108.7 (10) |             |
| C6—N1—C5 | 107.1 (6) | C16—C15—C17 | 107.2 (8)  |             |
| C7—N1—C1 | 112.5 (6) | C18—C15—N3  | 107.6 (8)  |             |
| C6—N1—C1 | 111.4 (6) | C16—C15—N3  | 111.3 (9)  |             |
| C5—N1—C1 | 113.8 (7) | C17—C15—N3  | 110.4 (7)  |             |
| C2—C1—C4 | 109.4 (8) | F3—C20—N3   | 108.8 (11) |             |
| C2—C1—C3 | 107.9 (7) | C26—N4—C28  | 110.5 (6)  |             |



|       |            |           |             |            |
|-------|------------|-----------|-------------|------------|
|       | C4—C1—C3   | 109.8 (8) | C26—N4—C27  | 108.3 (7)  |
|       | C2—C1—N1   | 110.6 (7) | C28—N4—C27  | 107.2 (7)  |
|       | C4—C1—N1   | 109.5 (6) | C26—N4—C22  | 111.5 (6)  |
|       | C3—C1—N1   | 109.6 (7) | C28—N4—C22  | 108.1 (6)  |
|       | F1—C7—N1   | 108.3 (7) | C27—N4—C22  | 111.1 (6)  |
| 200 K | C14—N2—C12 | 107.2 (7) | C25—C22—C23 | 111.6 (7)  |
|       | C14—N2—C13 | 103.6 (7) | C25—C22—C24 | 109.4 (8)  |
|       | C12—N2—C13 | 107.5 (8) | C23—C22—C24 | 108.6 (7)  |
|       | C14—N2—C8  | 113.9 (6) | C25—C22—N4  | 110.1 (6)  |
|       | C12—N2—C8  | 111.8 (7) | C23—C22—N4  | 109.7 (6)  |
|       | C13—N2—C8  | 112.3 (6) | C24—C22—N4  | 107.4 (6)  |
|       | C10—C8—C9  | 108.8 (8) | F4—C28—N4   | 107.1 (7)  |
|       | C10—C8—C11 | 111.0 (8) | Br1—Zn1—Br3 | 112.63 (5) |
|       | C9—C8—C11  | 108.9 (7) | Br1—Zn1—Br2 | 108.06 (4) |
|       | C10—C8—N2  | 110.3 (6) | Br3—Zn1—Br2 | 105.80 (5) |
|       | C9—C8—N2   | 108.7 (7) | Br1—Zn1—Br4 | 109.33 (5) |
|       | C11—C8—N2  | 109.1 (7) | Br3—Zn1—Br4 | 107.39 (4) |
|       | F2—C14—N2  | 107.3 (8) | Br2—Zn1—Br4 | 113.69 (5) |
|       | C21—N3—C19 | 108.1 (7) | Br8—Zn2—Br6 | 115.65 (5) |
|       | C21—N3—C20 | 110.2 (8) | Br8—Zn2—Br7 | 109.00 (5) |
|       | C19—N3—C20 | 99.4 (9)  | Br6—Zn2—Br7 | 107.88 (5) |
|       | C21—N3—C15 | 114.2 (7) | Br8—Zn2—Br5 | 105.48 (4) |
| 200 K | C19—N3—C15 | 111.2 (8) | Br6—Zn2—Br5 | 109.57 (5) |
|       | C20—N3—C15 | 112.5 (7) | Br7—Zn2—Br5 | 109.13 (5) |
|       | F1—C7      | 1.326 (7) | N3—C20      | 1.550 (8)  |
|       | N1—C5      | 1.493 (7) | C15—C17     | 1.525 (7)  |
|       | N1—C7      | 1.489 (8) | C15—C16     | 1.550 (9)  |
|       | N1—C6      | 1.494 (7) | C15—C18     | 1.558 (9)  |
|       | N1—C1      | 1.509 (7) | N4—C26      | 1.508 (9)  |

|       |          |           |             |             |
|-------|----------|-----------|-------------|-------------|
|       | C1—C3    | 1.520 (8) | N4—C27      | 1.514 (8)   |
|       | C1—C4    | 1.529 (7) | N4—C22      | 1.524 (5)   |
|       | C1—C2    | 1.527 (6) | N4—C28      | 1.537 (9)   |
|       | F2—C14   | 1.407 (9) | C22—C24     | 1.537 (10)  |
|       | N2—C8    | 1.502 (5) | C22—C25     | 1.516 (8)   |
|       | N2—C14   | 1.505 (8) | C22—C23     | 1.562 (9)   |
| 233 K | N2—C12   | 1.508 (8) | Br1—Zn1     | 2.434 (2)   |
|       | N2—C13   | 1.520 (9) | Br2—Zn1     | 2.3983 (13) |
|       | C8—C9    | 1.529 (9) | Br3—Zn1     | 2.3935 (12) |
|       | C8—C11   | 1.538 (7) | Br4—Zn1     | 2.4015 (14) |
|       | C8—C10   | 1.541 (9) | Br5—Zn2     | 2.3867 (12) |
|       | F3—C21   | 1.337 (7) | Br6—Zn2     | 2.3995 (12) |
|       | N3—C15   | 1.501 (5) | Br7—Zn2     | 2.4144 (16) |
|       | N3—C19   | 1.496 (8) | Br8—Zn2     | 2.4392 (16) |
|       | N3—C21   | 1.528 (9) | F4—C28      | 1.472 (10)  |
|       | C5—N1—C7 | 108.1 (6) | N3—C15—C17  | 110.3 (4)   |
|       | C5—N1—C6 | 104.4 (5) | N3—C15—C16  | 107.7 (4)   |
|       | C7—N1—C6 | 115.6 (5) | C17—C15—C16 | 102.7 (5)   |
|       | C5—N1—C1 | 110.5 (6) | N3—C15—C18  | 105.9 (4)   |
|       | C7—N1—C1 | 109.2 (4) | C17—C15—C18 | 109.7 (5)   |
|       | C6—N1—C1 | 108.9 (5) | C16—C15—C18 | 120.4 (5)   |
|       | N1—C1—C3 | 112.7 (4) | F3—C21—N3   | 106.9 (7)   |
|       | N1—C1—C4 | 111.1 (6) | C26—N4—C27  | 104.4 (5)   |
|       | C3—C1—C4 | 106.6 (7) | C26—N4—C22  | 107.2 (5)   |
|       | N1—C1—C2 | 108.7 (5) | C27—N4—C22  | 115.7 (5)   |
|       | C3—C1—C2 | 114.8 (5) | C26—N4—C28  | 115.2 (5)   |
|       | C4—C1—C2 | 102.5 (4) | C27—N4—C28  | 104.6 (6)   |
|       | F1—C7—N1 | 111.9 (6) | C22—N4—C28  | 109.9 (4)   |

|                      |            |             |                       |                     |
|----------------------|------------|-------------|-----------------------|---------------------|
| 233 K                | C8—N2—C14  | 114.2 (4)   | C24—C22—C25           | 104.1 (6)           |
|                      | C8—N2—C12  | 113.0 (4)   | C24—C22—N4            | 106.0 (5)           |
|                      | C14—N2—C12 | 104.0 (6)   | C25—C22—N4            | 113.7 (5)           |
|                      | C8—N2—C13  | 107.8 (5)   | C24—C22—C23           | 113.0 (6)           |
|                      | C14—N2—C13 | 106.9 (5)   | C25—C22—C23           | 99.7 (6)            |
|                      | C12—N2—C13 | 110.8 (6)   | N4—C22—C23            | 119.5 (5)           |
|                      | N2—C8—C9   | 110.2 (5)   | Br3—Zn1—Br2           | 106.04 (5)          |
|                      | N2—C8—C11  | 114.8 (4)   | Br3—Zn1—Br4           | 108.68 (6)          |
|                      | C9—C8—C11  | 113.0 (6)   | Br2—Zn1—Br4           | 107.00 (6)          |
|                      | N2—C8—C10  | 107.8 (5)   | Br3—Zn1—Br1           | 110.54 (6)          |
|                      | C9—C8—C10  | 106.4 (6)   | Br2—Zn1—Br1           | 114.17 (6)          |
|                      | C11—C8—C10 | 104.2 (6)   | Br4—Zn1—Br1           | 110.18 (6)          |
|                      | F2—C14—N2  | 108.6 (7)   | Br5—Zn2—Br6           | 108.20 (4)          |
|                      | C15—N3—C19 | 110.7 (5)   | Br5—Zn2—Br7           | 105.77 (6)          |
|                      | C15—N3—C21 | 108.6 (4)   | Br6—Zn2—Br7           | 112.63 (5)          |
|                      | C19—N3—C21 | 105.2 (6)   | Br5—Zn2—Br8           | 112.58 (5)          |
|                      | C15—N3—C20 | 101.8 (4)   | Br6—Zn2—Br8           | 108.52 (6)          |
|                      | C19—N3—C20 | 109.1 (6)   | Br7—Zn2—Br8           | 109.18 (4)          |
|                      | C21—N3—C20 | 121.3 (5)   | F4—C28—N4             | 94.5 (6)            |
|                      | 293 K      | F1—C18      | 1.410 (8)             | N1—C6 <sup>ii</sup> |
| C10—C12              |            | 1.510 (11)  | N1—C6                 | 1.560 (7)           |
| C10—N2               |            | 1.527 (6)   | C2—C3                 | 1.533 (9)           |
| C10—C11              |            | 1.651 (8)   | C2—C3 <sup>ii</sup>   | 1.533 (9)           |
| C10—C11 <sup>i</sup> |            | 1.651 (8)   | C2—C5                 | 1.579 (10)          |
| C16—N2               |            | 1.5317 (13) | C8—F3 <sup>ii</sup>   | 1.431 (8)           |
| N2—C18               |            | 1.5305 (13) | C8—F3                 | 1.431 (8)           |
| N2—C16 <sup>i</sup>  |            | 1.5316 (13) | Zn1—Br3 <sup>ii</sup> | 2.3850 (9)          |
| C18—F1 <sup>i</sup>  |            | 1.410 (8)   | Br1—Zn1               | 2.4052 (13)         |
| N1—C2                |            | 1.526 (8)   | Br2—Zn1               | 2.4150 (12)         |

293 K

|                          |             |                            |            |
|--------------------------|-------------|----------------------------|------------|
| N1—C8                    | 1.541 (10)  | Br3—Zn1                    | 2.3851 (9) |
| C18—F1—F1 <sup>i</sup>   | 51.8 (4)    | C2—N1—C6                   | 111.6 (4)  |
| C12—C10—N2               | 117.0 (7)   | C8—N1—C6                   | 90.2 (4)   |
| C12—C10—C11              | 95.5 (5)    | C6 <sup>ii</sup> —N1—C6    | 122.0 (7)  |
| N2—C10—C11               | 115.8 (4)   | N1—C2—C3                   | 124.8 (4)  |
| C12—C10—C11 <sup>i</sup> | 95.5 (5)    | N1—C2—C3 <sup>ii</sup>     | 124.8 (4)  |
| N2—C10—C11 <sup>i</sup>  | 115.8 (4)   | C3—C2—C3 <sup>ii</sup>     | 109.0 (8)  |
| C11—C10—C11 <sup>i</sup> | 113.8 (8)   | N1—C2—C5                   | 106.5 (6)  |
| C10—N2—C18               | 106.0 (3)   | C3—C2—C5                   | 86.6 (6)   |
| C10—N2—C16 <sup>i</sup>  | 120.82 (17) | C3 <sup>ii</sup> —C2—C5    | 86.6 (6)   |
| C18—N2—C16 <sup>i</sup>  | 103.66 (13) | F3 <sup>ii</sup> —C8—F3    | 135.3 (12) |
| C10—N2—C16               | 120.82 (17) | F3 <sup>ii</sup> —C8—N1    | 109.2 (6)  |
| C18—N2—C16               | 103.66 (13) | F3—C8—N1                   | 109.2 (6)  |
| C16 <sup>i</sup> —N2—C16 | 99.58 (13)  | Br3 <sup>ii</sup> —Zn1—Br3 | 110.87 (5) |
| F1—C18—F1 <sup>i</sup>   | 76.4 (8)    | Br3 <sup>ii</sup> —Zn1—Br1 | 108.23 (4) |
| F1—C18—N2                | 108.2 (6)   | Br3—Zn1—Br1                | 108.23 (4) |
| F1 <sup>i</sup> —C18—N2  | 108.2 (6)   | Br3 <sup>ii</sup> —Zn1—Br2 | 108.00 (3) |
| Br1—Zn1—Br2              | 113.54 (5)  | Br3—Zn1—Br2                | 108.00 (3) |

---

Symmetry codes: (i)  $x, -y+1/2, z$ ; (ii)  $x, -y+3/2, z$ .

**Figure S7.** Hydrogen bonds at 200 K for **2**.

| D—H···A                       | D—H  | H···A | D···A      | <DHA |
|-------------------------------|------|-------|------------|------|
| C28—H28B···Br3 <sup>i</sup>   | 0.97 | 3.01  | 3.733 (9)  | 133  |
| C28—H28B···Br1 <sup>i</sup>   | 0.97 | 3.00  | 3.784 (9)  | 138  |
| C28—H28A···Br4                | 0.97 | 3.10  | 4.050 (9)  | 165  |
| C27—H27C···Br8 <sup>ii</sup>  | 0.96 | 3.07  | 3.642 (10) | 120  |
| C27—H27A···Br7 <sup>iii</sup> | 0.96 | 3.12  | 3.939 (9)  | 144  |
| C26—H26C···Br7 <sup>iii</sup> | 0.96 | 2.93  | 3.852 (7)  | 163  |
| C26—H26B···Br3 <sup>i</sup>   | 0.96 | 3.01  | 3.862 (9)  | 148  |
| C24—H24C···Br5 <sup>iv</sup>  | 0.96 | 2.87  | 3.797 (8)  | 163  |
| C24—H24B···Br8 <sup>ii</sup>  | 0.96 | 3.10  | 4.049 (9)  | 172  |
| C21—H21A···Br7 <sup>v</sup>   | 0.96 | 3.02  | 3.971 (12) | 172  |
| C20—H20A···Br5                | 0.97 | 2.76  | 3.668 (12) | 156  |
| C19—H19C···Br4 <sup>vi</sup>  | 0.96 | 3.08  | 3.790 (10) | 132  |
| C19—H19B···Br6                | 0.96 | 3.05  | 3.909 (12) | 150  |
| C19—H19A···Br2 <sup>vi</sup>  | 0.96 | 2.85  | 3.740 (14) | 154  |
| C17—H17A···Br5                | 0.96 | 2.98  | 3.915 (11) | 166  |
| C16—H16A···Br7 <sup>v</sup>   | 0.96 | 3.01  | 3.967 (12) | 172  |
| C14—H14B···Br7                | 0.97 | 2.98  | 3.809 (9)  | 144  |
| C14—H14A···Br3                | 0.97 | 3.01  | 3.857 (8)  | 147  |
| C13—H13C···Br3                | 0.96 | 3.03  | 3.886 (9)  | 150  |
| C13—H13B···Br6 <sup>v</sup>   | 0.96 | 2.99  | 3.894 (9)  | 157  |
| C13—H13A···F3                 | 0.96 | 2.60  | 3.511 (17) | 159  |
| C12—H12A···Br4                | 0.96 | 3.09  | 3.758 (9)  | 128  |
| C12—H12A···Br3                | 0.96 | 3.10  | 3.896 (10) | 141  |
| C11—H11C···Br6 <sup>v</sup>   | 0.96 | 3.13  | 4.088 (10) | 173  |
| C10—H10B···Br1 <sup>i</sup>   | 0.96 | 3.12  | 3.964 (9)  | 147  |
| C9—H9B···Br8 <sup>v</sup>     | 0.96 | 2.96  | 3.689 (10) | 133  |
| C9—H9A···Br2 <sup>vii</sup>   | 0.96 | 3.03  | 3.951 (9)  | 162  |

---

|                              |      |      |            |     |
|------------------------------|------|------|------------|-----|
| C7—H7B···Br8                 | 0.97 | 2.93 | 3.823 (8)  | 154 |
| C7—H7A···Br5 <sup>viii</sup> | 0.97 | 3.00 | 3.956 (9)  | 167 |
| C6—H6C···Br5 <sup>viii</sup> | 0.96 | 3.02 | 3.954 (10) | 166 |
| C5—H5B···Br1 <sup>ix</sup>   | 0.96 | 2.99 | 3.867 (10) | 152 |
| C2—H2B···Br2 <sup>viii</sup> | 0.96 | 3.09 | 3.902 (10) | 143 |
| C2—H2B···Br2 <sup>viii</sup> | 0.96 | 3.09 | 3.902 (10) | 143 |
| C5—H5B···Br1 <sup>ix</sup>   | 0.96 | 2.99 | 3.867 (10) | 152 |
| C6—H6C···Br5 <sup>viii</sup> | 0.96 | 3.02 | 3.954 (10) | 166 |
| C7—H7A···Br5 <sup>viii</sup> | 0.97 | 3.00 | 3.956 (9)  | 167 |
| C7—H7B···Br8                 | 0.97 | 2.93 | 3.823 (8)  | 154 |
| C9—H9A···Br2 <sup>vii</sup>  | 0.96 | 3.03 | 3.951 (9)  | 162 |
| C9—H9B···Br8 <sup>v</sup>    | 0.96 | 2.96 | 3.689 (10) | 133 |
| C10—H10B···Br1 <sup>i</sup>  | 0.96 | 3.12 | 3.964 (9)  | 147 |
| C11—H11C···Br6 <sup>v</sup>  | 0.96 | 3.13 | 4.088 (10) | 173 |
| C12—H12A···Br3               | 0.96 | 3.10 | 3.896 (10) | 141 |
| C12—H12A···Br4               | 0.96 | 3.09 | 3.758 (9)  | 128 |
| C13—H13A···F3                | 0.96 | 2.60 | 3.511 (17) | 159 |
| C13—H13B···Br6 <sup>v</sup>  | 0.96 | 2.99 | 3.894 (9)  | 157 |
| C13—H13C···Br3               | 0.96 | 3.03 | 3.886 (9)  | 150 |
| C14—H14A···Br3               | 0.97 | 3.01 | 3.857 (8)  | 147 |
| C14—H14B···Br7               | 0.97 | 2.98 | 3.809 (9)  | 144 |
| C16—H16A···Br7 <sup>v</sup>  | 0.96 | 3.01 | 3.967 (12) | 172 |
| C17—H17A···Br5               | 0.96 | 2.98 | 3.915 (11) | 166 |
| C19—H19A···Br2 <sup>vi</sup> | 0.96 | 2.85 | 3.740 (14) | 154 |
| C19—H19B···Br6               | 0.96 | 3.05 | 3.909 (12) | 150 |
| C19—H19C···Br4 <sup>vi</sup> | 0.96 | 3.08 | 3.790 (10) | 132 |
| C20—H20A···Br5               | 0.97 | 2.76 | 3.668 (12) | 156 |
| C21—H21A···Br7 <sup>v</sup>  | 0.96 | 3.02 | 3.971 (12) | 172 |
| C24—H24B···Br8 <sup>ii</sup> | 0.96 | 3.10 | 4.049 (9)  | 172 |

---

|                               |      |      |            |     |
|-------------------------------|------|------|------------|-----|
| C24—H24C···Br5 <sup>iv</sup>  | 0.96 | 2.87 | 3.797 (8)  | 163 |
| C26—H26B···Br3 <sup>i</sup>   | 0.96 | 3.01 | 3.862 (9)  | 148 |
| C26—H26C···Br7 <sup>iii</sup> | 0.96 | 2.93 | 3.852 (7)  | 163 |
| C27—H27A···Br7 <sup>iii</sup> | 0.96 | 3.12 | 3.939 (9)  | 144 |
| C27—H27C···Br8 <sup>ii</sup>  | 0.96 | 3.07 | 3.642 (10) | 120 |
| C28—H28A···Br4                | 0.97 | 3.10 | 4.050 (9)  | 165 |
| C28—H28B···Br1 <sup>i</sup>   | 0.97 | 3.00 | 3.784 (9)  | 138 |
| C28—H28B···Br3 <sup>i</sup>   | 0.97 | 3.01 | 3.733 (9)  | 133 |

Symmetry codes: (i)  $-x+1, y-1/2, -z+3/2$ ; (ii)  $-x+1, y+1/2, -z+3/2$ ; (iii)  $x-1, y, z$ ; (iv)  $x, -y+3/2, z+1/2$ ; (v)  $-x+2, y+1/2, -z+3/2$ ; (vi)  $x+1, y, z$ ; (vii)  $x+1, -y+3/2, z+1/2$ ; (viii)  $-x+1, -y+1, -z+1$ ; (ix)  $x, -y+3/2, z-1/2$ .

**Figure S8.** Hydrogen bonds at 233 K for **2**.

| D—H···A                       | D—H  | H···A | D···A      | <DHA |
|-------------------------------|------|-------|------------|------|
| C20—H20B···Br4 <sup>i</sup>   | 0.96 | 3.04  | 3.851 (4)  | 143  |
| C25—H25C···F4                 | 0.96 | 2.52  | 3.001 (17) | 111  |
| C24—H24A···F4                 | 0.96 | 1.38  | 2.185 (15) | 137  |
| C21—H21B···Br7 <sup>ii</sup>  | 0.97 | 3.19  | 3.804 (6)  | 123  |
| C21—H21B···Br6 <sup>ii</sup>  | 0.97 | 2.96  | 3.828 (7)  | 150  |
| C19—H19B···Br4 <sup>i</sup>   | 0.96 | 3.21  | 3.885 (7)  | 129  |
| C17—H17B···Br7 <sup>iii</sup> | 0.96 | 3.10  | 4.017 (9)  | 160  |
| C16—H16B···Br3 <sup>iii</sup> | 0.96 | 2.83  | 3.766 (5)  | 166  |
| C14—H14A···Br7                | 0.97 | 2.95  | 3.822 (6)  | 150  |
| C13—H13B···Br8                | 0.96 | 3.17  | 3.655 (5)  | 113  |
| C12—H12A···Br1 <sup>iv</sup>  | 0.96 | 2.95  | 3.829 (7)  | 153  |
| C11—H11B···Br5 <sup>v</sup>   | 0.96 | 3.01  | 3.906 (7)  | 156  |
| C7—H7A···Br2 <sup>vi</sup>    | 0.97 | 2.88  | 3.714 (4)  | 145  |
| C6—H6C···Br6 <sup>ii</sup>    | 0.96 | 3.11  | 3.951 (8)  | 147  |
| C6—H6A···F2                   | 0.96 | 2.64  | 3.377 (9)  | 134  |
| C5—H5A···F2                   | 0.96 | 2.31  | 3.265 (9)  | 172  |
| C4—H4B···Br1 <sup>vi</sup>    | 0.96 | 3.06  | 3.858 (7)  | 141  |
| C4—H4A···F1                   | 0.96 | 1.95  | 2.739 (16) | 139  |
| C2—H2C···Br1 <sup>vi</sup>    | 0.96 | 3.15  | 4.109 (5)  | 174  |

Symmetry codes: (i)  $x+1, y, z$ ; (ii)  $-x+1, y-1/2, -z+3/2$ ; (iii)  $x, -y+1/2, z-1/2$ ; (iv)  $-x, y+1/2, -z+3/2$ ; (v)  $x-1, -y+1/2, z-1/2$ ; (vi)  $-x+1, -y, -z+2$ .



**Figure S9.** Hydrogen bonds at 293 K for **2**.

| $D-H\cdots A$                        | $D-H$ | $H\cdots A$ | $D\cdots A$ | $D-H\cdots A$ |
|--------------------------------------|-------|-------------|-------------|---------------|
| C16—H16B $\cdots$ Br2 <sup>iii</sup> | 0.96  | 3.26        | 3.905 (2)   | 126           |
| C12—H12C $\cdots$ Br3 <sup>iv</sup>  | 0.96  | 2.88        | 3.823 (8)   | 168           |
| C12—H12B $\cdots$ Br3 <sup>v</sup>   | 0.96  | 2.88        | 3.823 (8)   | 168           |
| C12—H12A $\cdots$ Br2 <sup>vi</sup>  | 0.96  | 2.92        | 3.834 (13)  | 160           |
| C11—H11B $\cdots$ Br2 <sup>vi</sup>  | 0.96  | 2.92        | 3.797 (11)  | 153           |
| C11—H11A $\cdots$ F1                 | 0.96  | 1.92        | 2.493 (19)  | 116           |
| C11—H11A $\cdots$ F1                 | 0.96  | 1.92        | 2.493 (19)  | 116           |
| C11—H11B $\cdots$ Br2 <sup>vi</sup>  | 0.96  | 2.92        | 3.797 (11)  | 153           |
| C12—H12A $\cdots$ Br2 <sup>vi</sup>  | 0.96  | 2.92        | 3.834 (13)  | 160           |
| C12—H12B $\cdots$ Br3 <sup>v</sup>   | 0.96  | 2.88        | 3.823 (8)   | 168           |
| C12—H12C $\cdots$ Br3 <sup>iv</sup>  | 0.96  | 2.88        | 3.823 (8)   | 168           |

Symmetry codes: (iii)  $-x+3/2, -y+1, z+1/2$ ; (iv)  $x+1/2, y, -z+1/2$ ; (v)  $x+1/2, -y+1/2, -z+1/2$ ; (vi)  $-x+1, -y+1, -z$ .
